# Supplementary material for: Synthesis and Irreversible Thermochromic Sensor Applications of Manganese Violet
Source: MDPI journal article supplement (doi:10.3390/ma11091693), 2018-09-12
Supplement: s1 [file s1]

# Synthesis and Irreversible Thermochromic Sensor

## Applications of Manganese Violet

Duy Khiem Nguyen <sup>1</sup>, Quang-Vu Bach <sup>2</sup>, Jong-Han Lee <sup>3</sup>, and In-Tae Kim <sup>1,\*</sup>

<sup>1</sup> Department of Civil Engineering, Pusan National University, 2, Busandaehak-ro 63beon-gil, Geumjeong-gu, Busan, 46241, Republic of Korea; khiemduynguyen2000@yahoo.com

<sup>2</sup> Sustainable Management of Natural Resources and Environment Research group, Faculty of Environment and Labour Safety, Ton Duc Thang University, Ho Chi Minh City, Vietnam; bachquangvu@tdtu.edu.vn

<sup>3</sup> Department of Civil Engineering, Daegu University, 201, Daegudae-ro, Gyeongsan, Gyeongbuk 38453, Republic of Korea; jonghan@daegu.ac.kr

\* Correspondence: itkim@pusan.ac.kr; Tel.: +82-51-510-2497; Fax: +82-51-513-9596

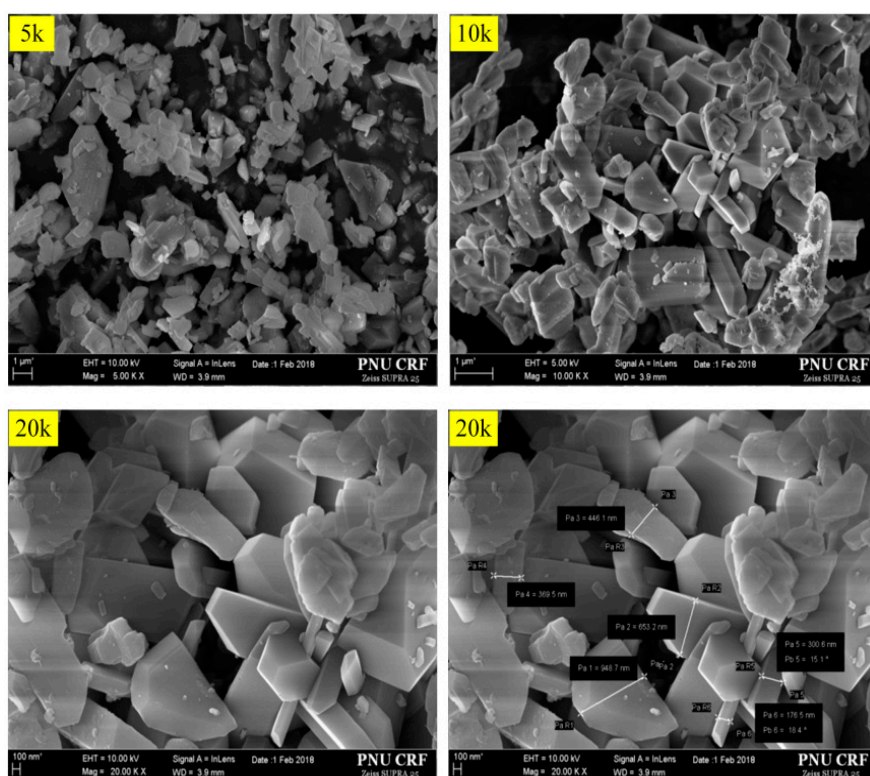

**Figure S1.** SEM micrographs of synthesized manganese violet pigment at different magnifications: 5 k $\times$ , 10 k $\times$ , and 20 k $\times$ .
